# Supplementary material
Source: MDPI journal article supplement (https://www.mdpi.com/2073-4395/10/8/1139)
Supplement: s1 [file s1]

Supplementary Information

# Assessing Soil Organic Carbon in Soils to Enhance and Track Future Carbon Stocks

Yun-Ya Yang, Avi Goldsmith, Ilana Herold, Sebastian Lecha, and Gurpal S. Toor \*

Department of Environmental Science and Technology, University of Maryland, College Park, MD 20742, USA

\* Correspondence: [gstoor@umd.edu](mailto:gstoor@umd.edu)

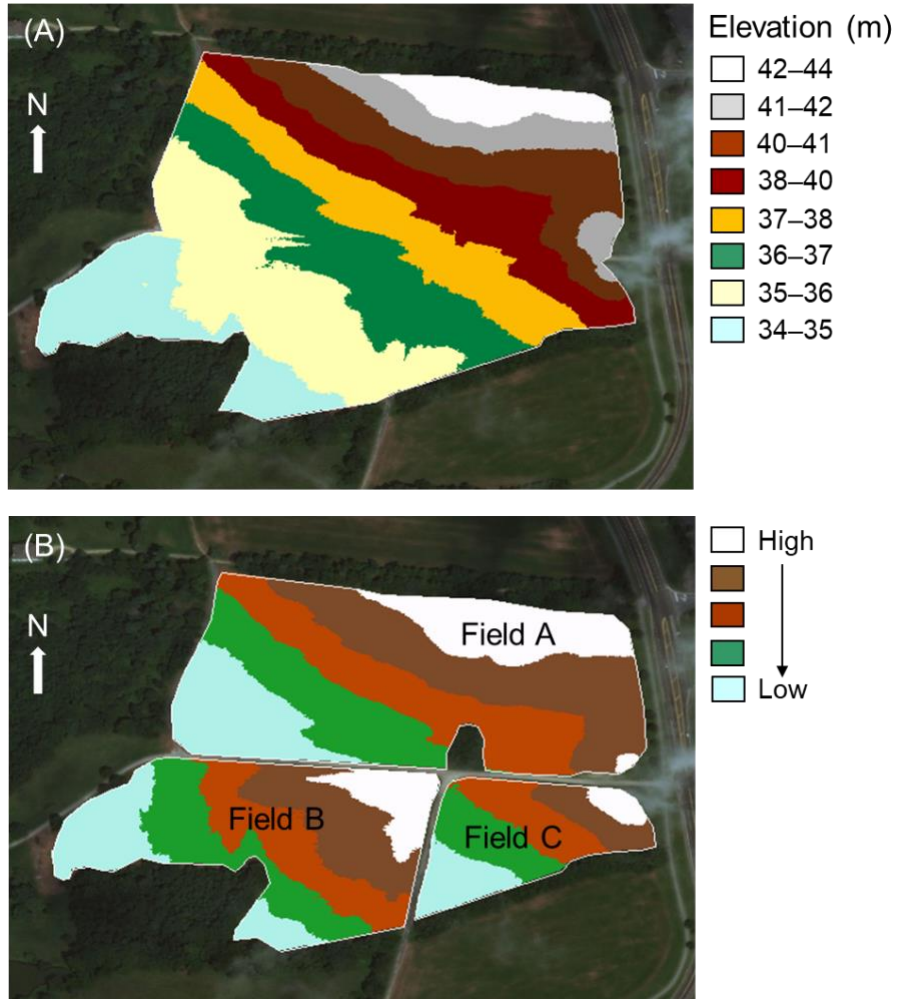

**S1 Figure.** Digital elevation map prepared using ArcGIS for the (A) study location showing all fields and (B) separate elevation map for three individual fields.

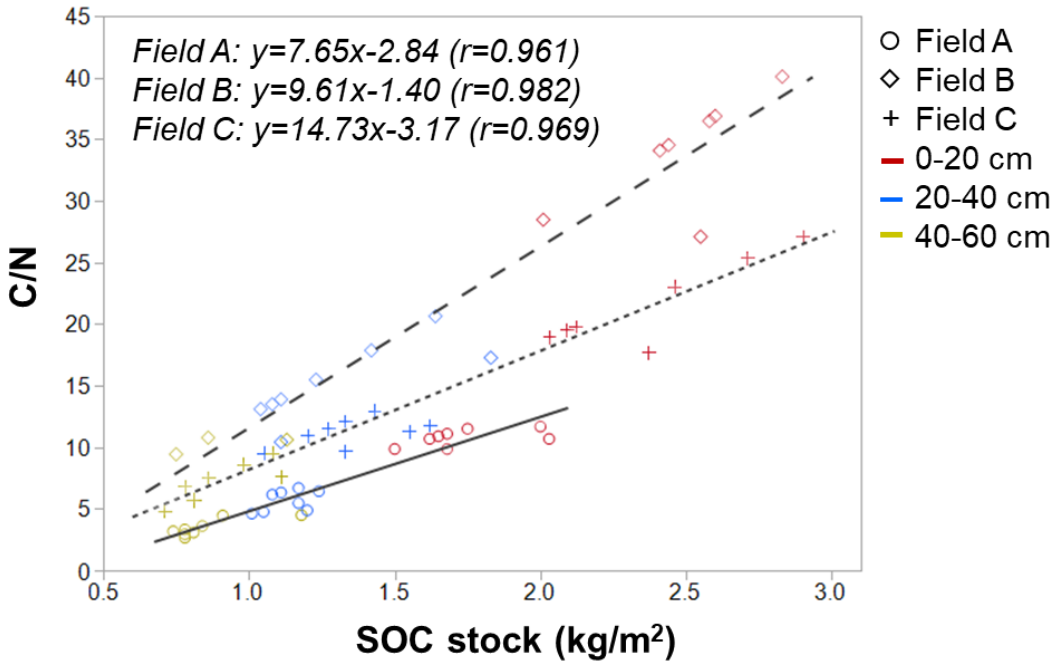

**S2 Figure.** Correlation between soil organic carbon stocks (kg/m<sup>2</sup>) and C/N ratios in three fields.

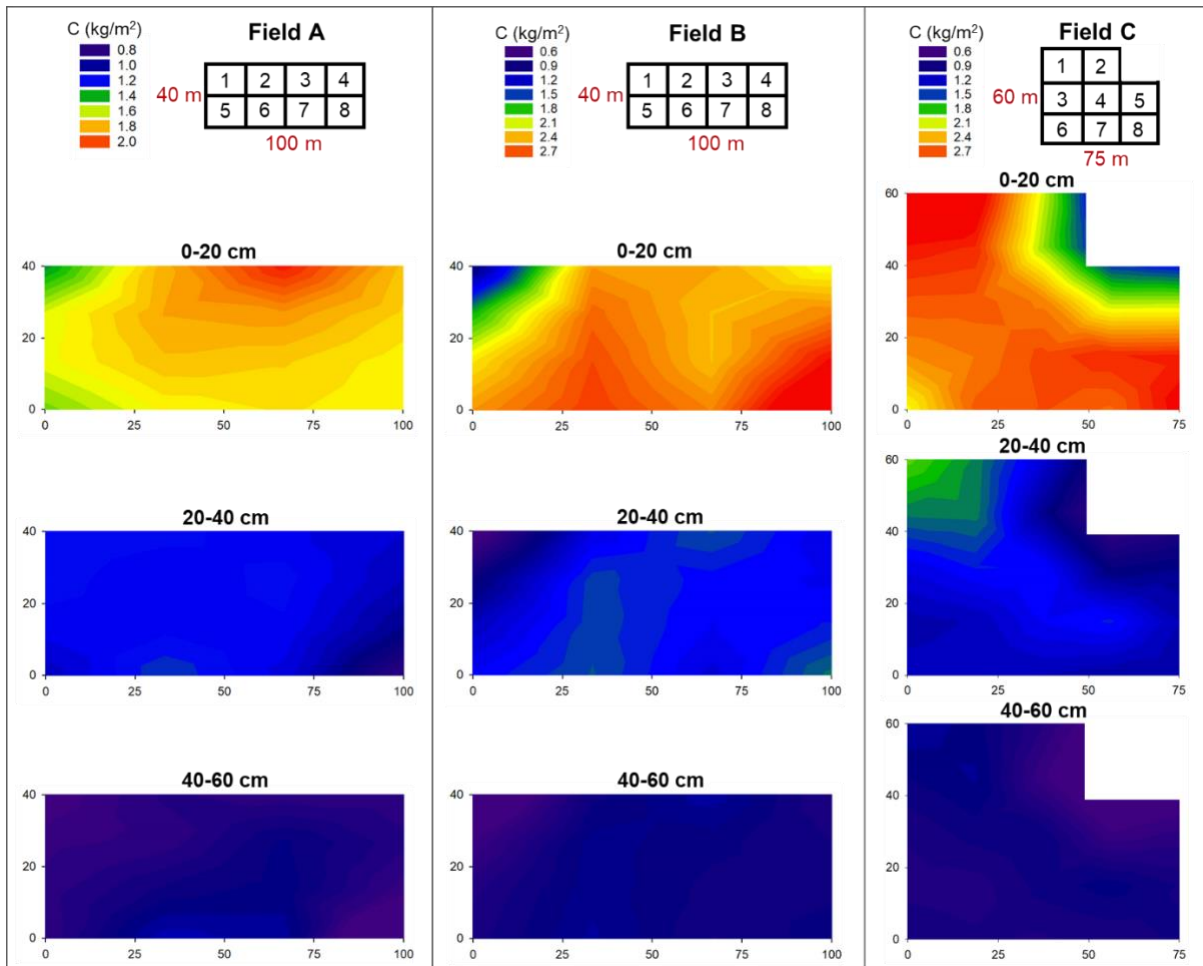

**S3 Figure.** Spatial distribution of soil organic carbon stocks (kg/m<sup>2</sup>) in three fields at three depths (n = 8 grids for each depth and field).
